# Supplementary material for: Overexpression of Scg5 increases enzymatic activity of PCSK2 and is inversely correlated with body weight in congenic mice
Source: PubMed Central journal article supplement (PMC2386500; doi:10.1186/1471-2156-9-34), 2008-04-25

Cluster Dendrogram for *Scg5* Haplotype Block 1

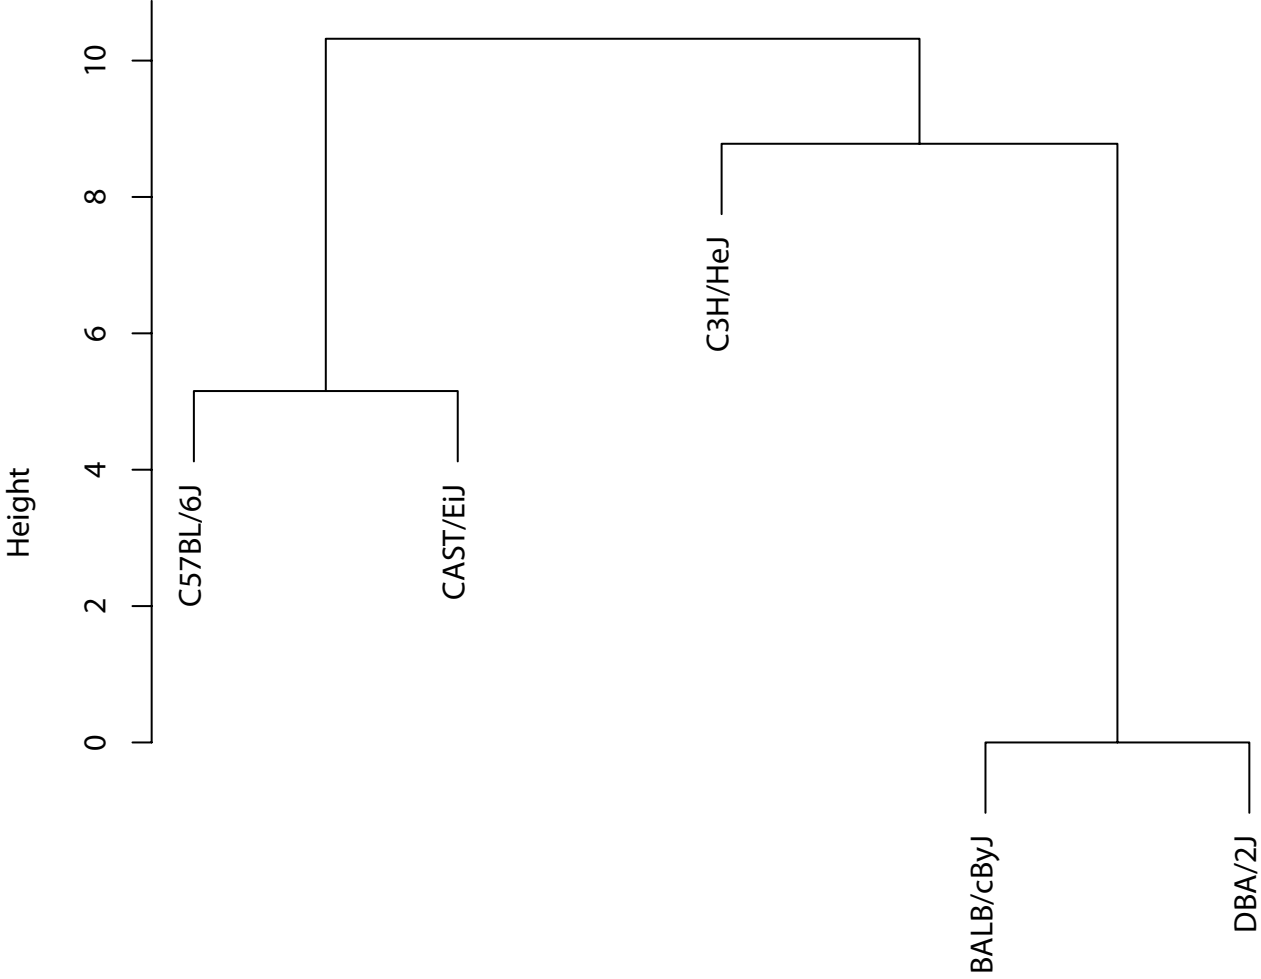

Cluster Dendrogram for *Scg5* Haplotype Block 2

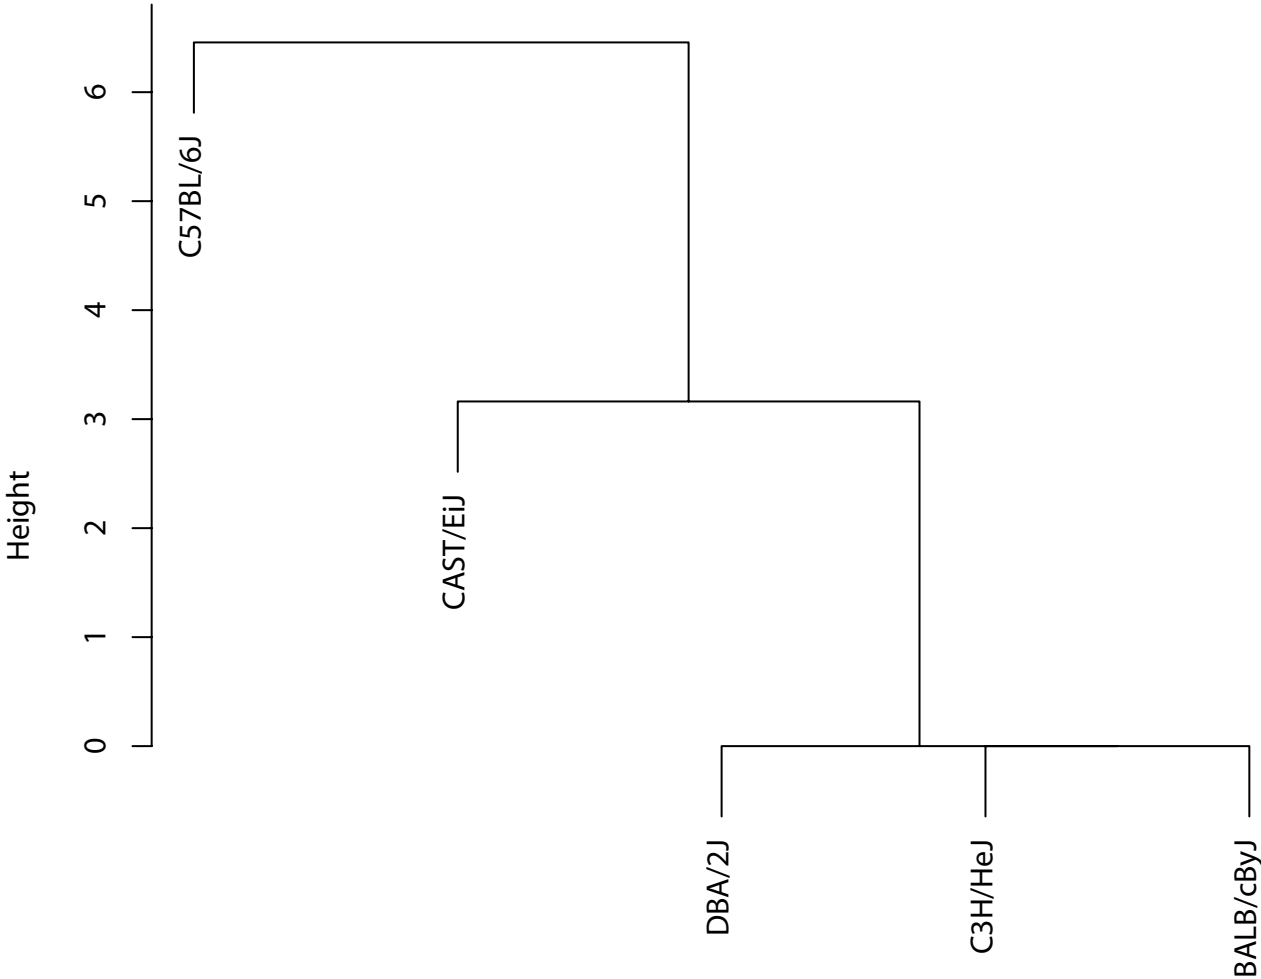

Supplement: 1471-2156-9-34-S4.pdf [file 1471-2156-9-34-S4.pdf]
