# Supplementary material for: Overexpression of Scg5 increases enzymatic activity of PCSK2 and is inversely correlated with body weight in congenic mice
Source: PubMed Central journal article supplement (PMC2386500; doi:10.1186/1471-2156-9-34), 2008-04-25
Supplement: 1471-2156-9-34-S5.pdf [file 1471-2156-9-34-S5.pdf]

**ADDITIONAL FILE 5.** *Scg5* promoter sequencing primers

| Primer | Sequence                    |
|--------|-----------------------------|
| SG1-F  | AGAATTGAATTGTTAATGTACCTCTG  |
| SG2-F  | ACCTGGGCCTTCTCTGTAGG        |
| SG3-F  | CCACATTTCTTATTTGGGAGGT      |
| SG4-F  | TTTTAGTCAAGTGTACTGGCACAT    |
| SG5-F  | CCAGCAACCTATTTTTCCAA        |
| SG6-F  | CCCGAAAGTGTCCTGCAC          |
| SG1-R  | GAACATTGGAAATATAATGAACTTTTG |
| SG2-R  | GCCCATGAAATTAGCAACAA        |
| SG3-R  | CTTGAGGAGTGCATGGGTCT        |
| SG4-R  | TCCCTGGATGCTTTCTGTTT        |
| SG5-R  | AGCCCTGGTGACAGTGCTAC        |
| SG6-R  | GATAGCTCCTGCGTCACCTC        |

| Primer set | Amplicon Size |
|------------|---------------|
| SG1        | 511           |
| SG2        | 593           |
| SG3        | 466           |
| SG4        | 563           |
| SG5        | 553           |
| SG6        | 468           |
