# Supplementary material for: Overexpression of Scg5 increases enzymatic activity of PCSK2 and is inversely correlated with body weight in congenic mice
Source: Springer Nature journal article supplement (doi:10.1186/1471-2156-9-34), 2008-04-25
Supplement: Additional file 1 [file 1471-2156-9-34-s1.pdf]

**ADDITIONAL FILE 1.** Differentially expressed genes in HG2DF2 non-recombinant F2 mice

| Gene Name            | Agilent Probe ID | Accession | FDR   | Chr. | Mbp<br>UCSC Feb. 2006 | Fold<br>change | High expressing strain |
|----------------------|------------------|-----------|-------|------|-----------------------|----------------|------------------------|
| <i>Drbp1</i>         | A_51_P451374     | NM_153405 | 0.222 | 2    | 76.171                | 6.09           | CAST                   |
| <i>AK078845</i>      | A_52_P1052731    | AK078845  | 0.102 | 2    | 78.685                | 7.69           | HG                     |
| <i>D430039N05Rik</i> | A_51_P393654     | NM_175514 | 0.291 | 2    | 83.614                | 2.30           | HG                     |
| <i>Olf1153</i>       | A_52_P361391     | NM_146640 | 0.113 | 2    | 87.697                | 2.73           | HG                     |
| <i>AA718294</i>      | A_51_P308111     | AA718294  | 0.220 | 2    | 90.720                | 1.93           | HG                     |
| <i>Slc39a13</i>      | A_52_P6505       | AK035296  | 0.220 | 2    | 90.863                | 1.76           | CAST                   |
| <i>E130006N16Rik</i> | A_51_P139765     | AK053282  | 0.236 | 2    | 91.082                | 2.70           | HG                     |
| <i>2810427C15Rik</i> | A_52_P761812     | AK013171  | 0.121 | 2    | 92.107                | 6.46           | HG                     |
| <i>D030065N23Rik</i> | A_52_P1116376    | AK083682  | 0.266 | 2    | 92.132                | 3.42           | HG                     |
| <i>2810002D19Rik</i> | A_52_P158305     | BC022909  | 0.256 | 2    | 94.207                | 2.26           | HG                     |
| <i>Cd44</i>          | A_52_P229536     | AK045226  | 0.150 | 2    | 102.515               | 1.81           | HG                     |
| <i>AK051363</i>      | A_52_P671465     | AK051363  | 0.278 | 2    | 103.589               | 1.66           | HG                     |
| <i>AK031920</i>      | A_52_P803354     | AK031920  | 0.182 | 2    | 104.439               | 3.46           | HG                     |
| <i>Al451465</i>      | A_51_P204286     | AK033552  | 0.266 | 2    | 112.272               | 1.66           | HG                     |
| <i>Fmn1</i>          | A_52_P321725     | X62379    | 0.097 | 2    | 113.242               | 6.46           | CAST                   |
| <i>Scg5</i>          | A_51_P221223     | NM_009162 | 0.102 | 2    | 113.578               | 2.96           | CAST                   |
| <i>Ivd</i>           | A_51_P425680     | NM_019826 | 0.182 | 2    | 118.553               | 1.44           | HG                     |
| <i>Mga</i>           | A_51_P193270     | NM_013720 | 0.266 | 2    | 119.564               | 2.07           | HG                     |
| <i>2310026J01Rik</i> | A_52_P203948     | BC066085  | 0.216 | 2    | 119.858               | 4.97           | CAST                   |
| <i>Vps39</i>         | A_51_P460828     | BC007479  | 0.097 | 2    | 120.008               | 2.96           | CAST                   |
| <i>5830445O15Rik</i> | A_52_P663742     | AK076333  | 0.220 | 2    | 120.098               | 1.41           | CAST                   |
| <i>4831403C07Rik</i> | A_51_P376501     | AK029170  | 0.219 | 2    | 120.396               | 1.35           | CAST                   |
| <i>B430315C20Rik</i> | A_52_P529790     | NM_178795 | 0.102 | 2    | 121.002               | 6.03           | HG                     |
| <i>Sema6d</i>        | A_51_P415755     | AK052232  | 0.121 | 2    | 124.302               | 2.59           | CAST                   |
| <i>Znf2</i>          | A_51_P105869     | NM_028141 | 0.278 | 2    | 127.267               | 2.30           | HG                     |
| <i>Mal</i>           | A_52_P562661     | NM_010762 | 0.172 | 2    | 127.325               | 1.97           | HG                     |
| <i>Stk35</i>         | A_52_P451834     | AK085193  | 0.097 | 2    | 129.492               | 2.62           | HG                     |
| <i>Gfra4</i>         | A_51_P241426     | NM_020014 | 0.287 | 2    | 130.732               | 4.11           | HG                     |
| <i>2310032D16Rik</i> | A_52_P470017     | NM_028802 | 0.102 | 2    | 132.221               | 5.78           | HG                     |
| <i>3300001M20Rik</i> | A_52_P525837     | NM_175113 | 0.220 | 2    | 132.496               | 2.53           | HG                     |
| <i>D2Bwg1356e</i>    | A_51_P319379     | AK129301  | 0.287 | 2    | 134.286               | 1.19           | HG                     |
| <i>AK086068</i>      | A_52_P739620     | AK086068  | 0.219 | 2    | 134.935               | 3.42           | HG                     |

| Gene Name                          | Agilent Probe ID | Accession | FDR   | Chr. | Mbp<br>UCSC Feb. 2006 | Fold<br>change | High expressing strain |
|------------------------------------|------------------|-----------|-------|------|-----------------------|----------------|------------------------|
| <i>Pak7</i>                        | A_52_P143252     | AK077967  | 0.121 | 2    | 135.773               | 3.03           | HG                     |
| <i>Snap25</i>                      | A_52_P286421     | NM_011428 | 0.102 | 2    | 136.405               | 8.71           | HG                     |
| <i>AK045769</i>                    | A_52_P1027959    | AK045769  | 0.185 | 2    | 140.524               | 5.03           | HG                     |
| <i>AK028486</i>                    | A_52_P763142     | AK028486  | 0.097 | 2    | 140.787               | 27.23          | HG                     |
| <i>1700006F03Rik</i>               | A_51_P131840     | AF440737  | 0.097 | 2    | 148.481               | 19.12          | CAST                   |
| <i>Cst3</i>                        | A_51_P332201     | NM_009976 | 0.278 | 2    | 148.563               | 1.72           | CAST                   |
| <i>BC029716</i>                    | A_52_P471592     | BC034102  | 0.097 | 2    | 149.695               | 3.38           | CAST                   |
| <i>AL033326</i>                    | A_51_P233578     | NM_019705 | 0.102 | 2    | 152.008               | 11.88          | HG                     |
| <i>H13</i>                         | A_52_P655663     | NM_010376 | 0.278 | 2    | 152.361               | 1.84           | CAST                   |
| <i>Pofut1</i>                      | A_52_P665833     | NM_080463 | 0.172 | 2    | 152.933               | 2.24           | HG                     |
| <i>9830001H06Rik</i>               | A_52_P257919     | AK031493  | 0.222 | 2    | 156.707               | 2.25           | HG                     |
| <i>2610304G08Rik</i>               | A_51_P229633     | NM_027434 | 0.230 | 2    | 157.720               | 3.06           | HG                     |
| <i>Actr5</i>                       | A_52_P594049     | NM_175419 | 0.182 | 2    | 158.316               | 1.86           | HG                     |
| <i>D930001I22Rik</i>               | A_52_P172441     | NM_173397 | 0.256 | 2    | 163.158               | 1.33           | CAST                   |
| <i>AK045608</i>                    | A_52_P1067686    | AK045608  | 0.216 | 2    | 164.183               | 2.15           | HG                     |
| <i>AK038166</i>                    | A_51_P389147     | AK038166  | 0.232 | 2    | 165.842               | 6.42           | HG                     |
| <i>Sdccag33l</i>                   | A_52_P126663     | AK046877  | 0.172 | 2    | 169.325               | 2.19           | CAST                   |
| <i>2900073F20Rik</i>               | A_52_P158431     | AK013774  | 0.220 | 2    | 169.331               | 3.00           | CAST                   |
| <i>Rab22a</i>                      | A_52_P582767     | NM_024436 | 0.102 | 2    | 173.303               | 2.55           | HG                     |
| <i>2210418O10Rik</i>               | A_51_P206849     | BC059210  | 0.219 | 2    | 176.503               | 1.88           | CAST                   |
| <i>LOC381422</i>                   | A_52_P347796     | XM_358573 | 0.186 | 2    | 176.899               | 2.32           | CAST                   |
| <i>BC025828</i>                    | A_52_P310652     | BC025828  | 0.182 | 2    | 177.478               | 2.89           | CAST                   |
| <i>C330013J21Rik</i>               | A_51_P211423     | AK021199  | 0.102 | 2    | 177.833               | 2.18           | CAST                   |
| Genes outside HG2D congenic region |                  |           |       |      |                       |                |                        |
| <i>BB755555</i>                    | A_52_P708886     | BB755555  | 0.182 | 1    | 7.169                 | 2.18           | HG                     |
| <i>Prg4</i>                        | A_51_P280455     | AB034730  | 0.219 | 1    | 152.214               | 1.38           | HG                     |
| <i>Oas2</i>                        | A_51_P277994     | NM_145227 | 0.182 | 5    | 120.991               | 1.56           | CAST                   |
| <i>9330160C06Rik</i>               | A_51_P481528     | AK034156  | 0.182 | 6    | 149.056               | 1.17           | HG                     |
| <i>6230410P16Rik</i>               | A_51_P194004     | NM_174846 | 0.172 | 9    | 106.011               | 2.16           | HG                     |
| <i>Igtp</i>                        | A_51_P112355     | NM_018738 | 0.097 | 11   | 58.0158               | 1.29           | CAST                   |
| <i>Egr1</i>                        | A_51_P367866     | NM_007913 | 0.133 | 18   | 34.987                | 1.31           | CAST                   |
