# Supplementary material for: Overexpression of Scg5 increases enzymatic activity of PCSK2 and is inversely correlated with body weight in congenic mice
Source: Springer Nature journal article supplement (doi:10.1186/1471-2156-9-34), 2008-04-25

**ADDITIONAL FILE 2:** *Sgnel* whole brain expression is upregulated in HG versus B6 male mice at 3, 4.5 and 9 weeks of age and the *Sgnel* promoter contains two tandem putative *Stat5b* DNA binding sites. A) Relative *Sgnel* expression is increased approximately 25% at 3 weeks and 40% at 4.5 weeks and 9 weeks of age. N = 5 for both strains at all ages. *Sgnel* expression at each age was scaled to levels of expression in B6 mice. B) *In silico* analysis revealed six *Stat5b* DNA binding sites (TTCYNRGAA) within the *Sgnel* gene. *Sgnel* exons are signified by black boxes and the position of *Stat5b* sites are labeled with a (★). Two of the sites were in tandem and located between -56 and -39 bp upstream of the transcription start site.

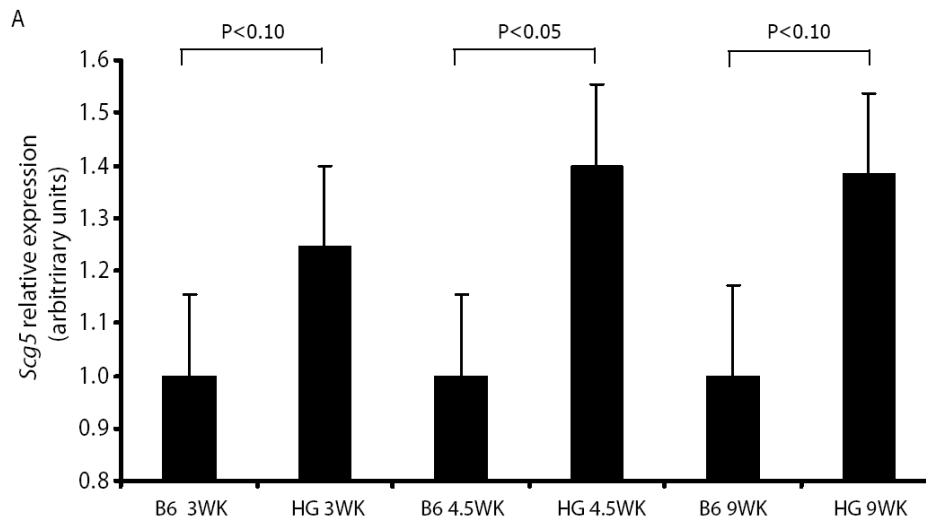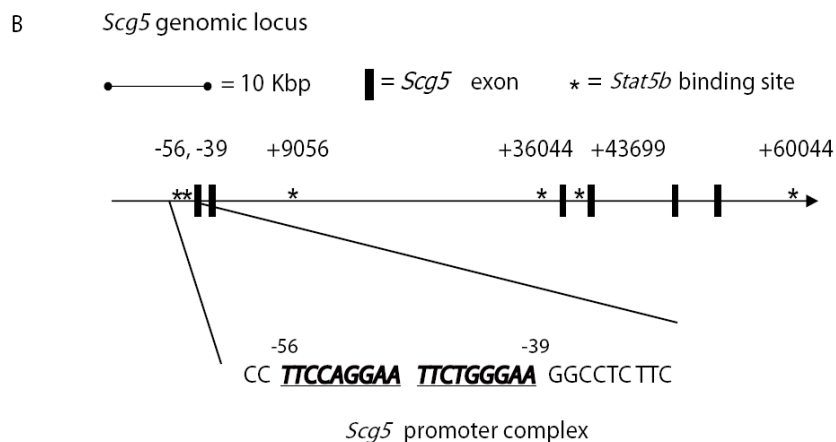

Supplement: Additional file 2 [file 1471-2156-9-34-s2.pdf]
